# Supplementary material for: Influence of fermented soy protein consumption on hypertension and gut microbial modulation in spontaneous hypertensive rats
Source: PubMed Central journal article supplement — Biosci Microbiota Food Health. 2020 May 14;39(4):199–208. doi: 10.12938/bmfh.2020-001 (PMC7573110; doi:10.12938/bmfh.2020-001), 2020-05-14
Supplement: bmfh-39-199-s001.pdf [file bmfh-39-199-s001.pdf]

## 1 Supplementary materials

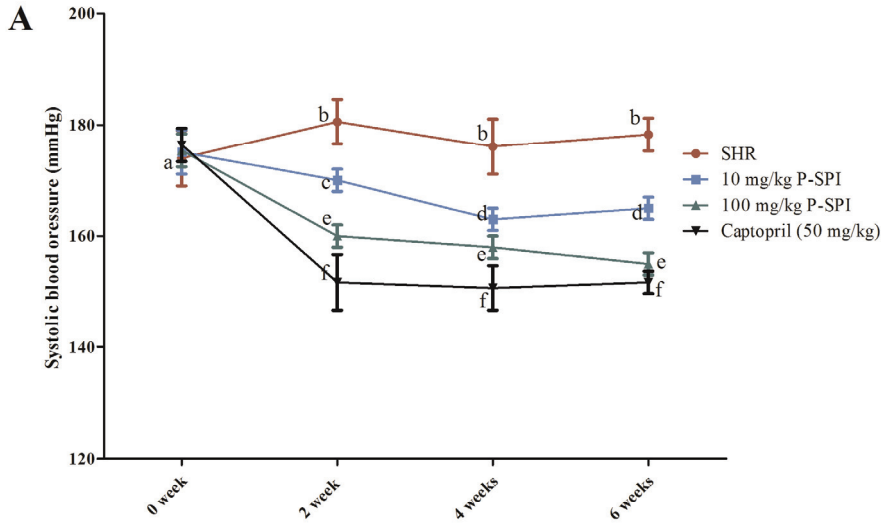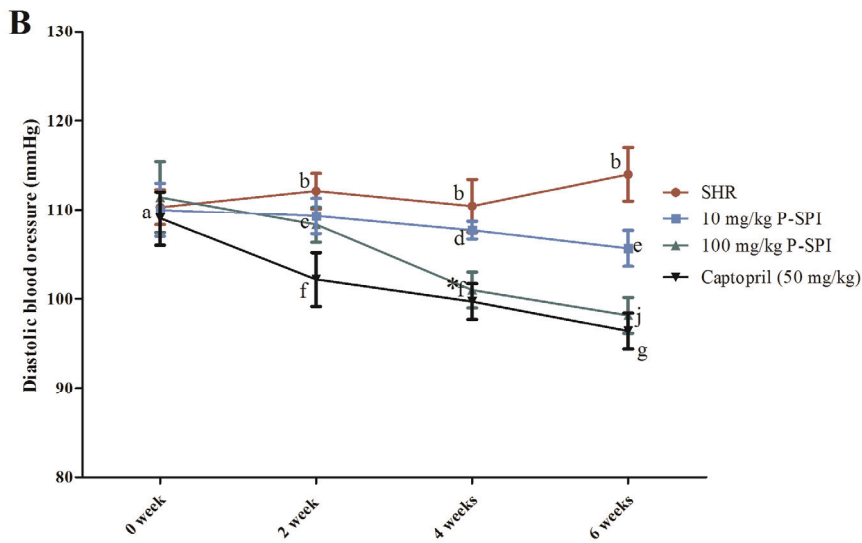

2

3 Supplementary Figure 1. Time course of A) systolic blood pressure and B) diastolic blood  
4 pressure changes in SHR after oral administration of physiological saline, 50 mg/kg, and 100  
5 mg/kg body weight of P-SPI. Each data point represents mean  $\pm$  SEM from 5 determinations,  
6 and data points with (\*) are significantly different ( $p < 0.05$ ) using one-way ANOVA followed  
7 by Duncan tests.

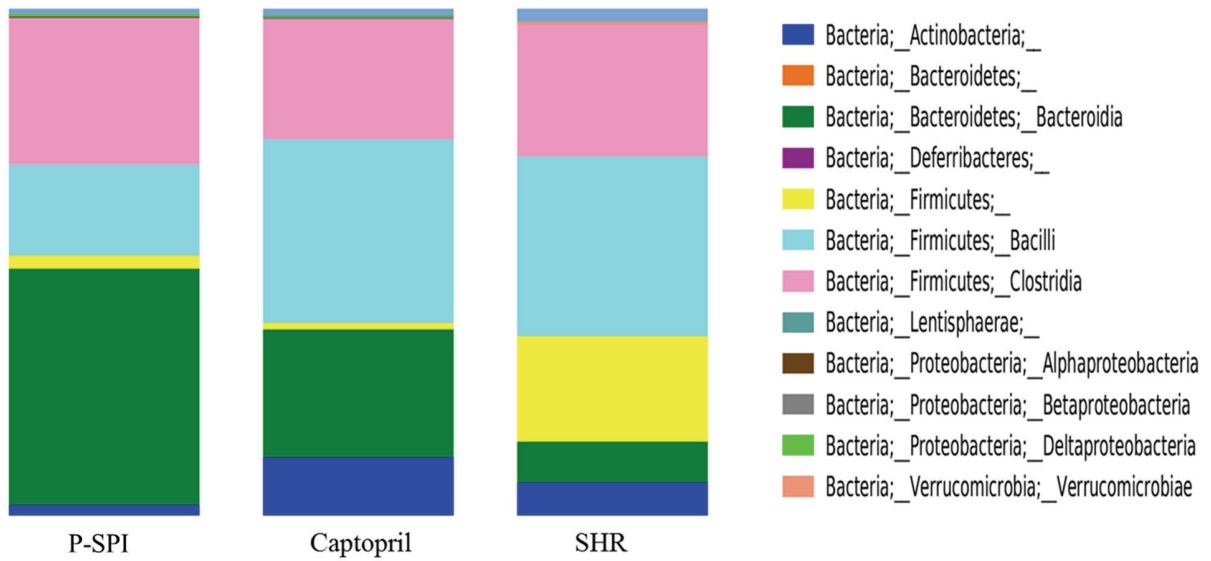

8

9 Supplementary Figure 2. Bacterial class distribution of OTUs retrieved from fecal samples. Each  
 10 column corresponds to spontaneous hypertensive rats fed with P-SPI, Captopril or distilled water.

11

12

13

14

15

16

17

18

19

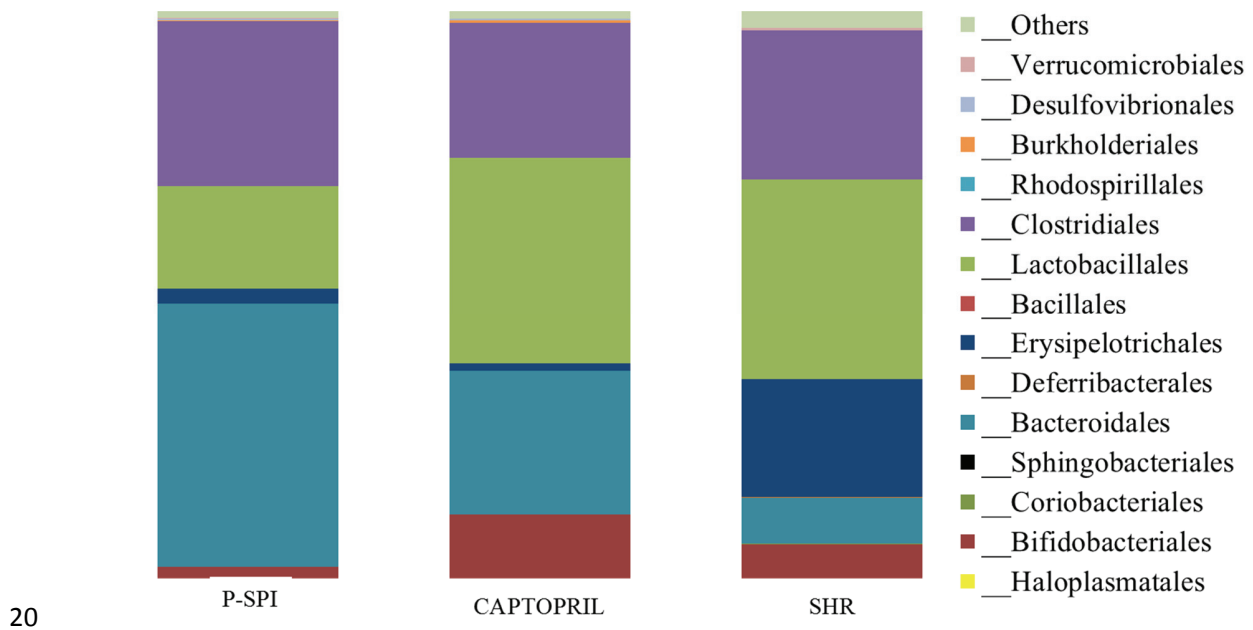

21 Supplementary Figure 3. Bacterial order distribution of OTUs retrieved from fecal samples. Each  
 22 column corresponds to spontaneous hypertensive rats fed with P-SPI, Captopril or distilled water.

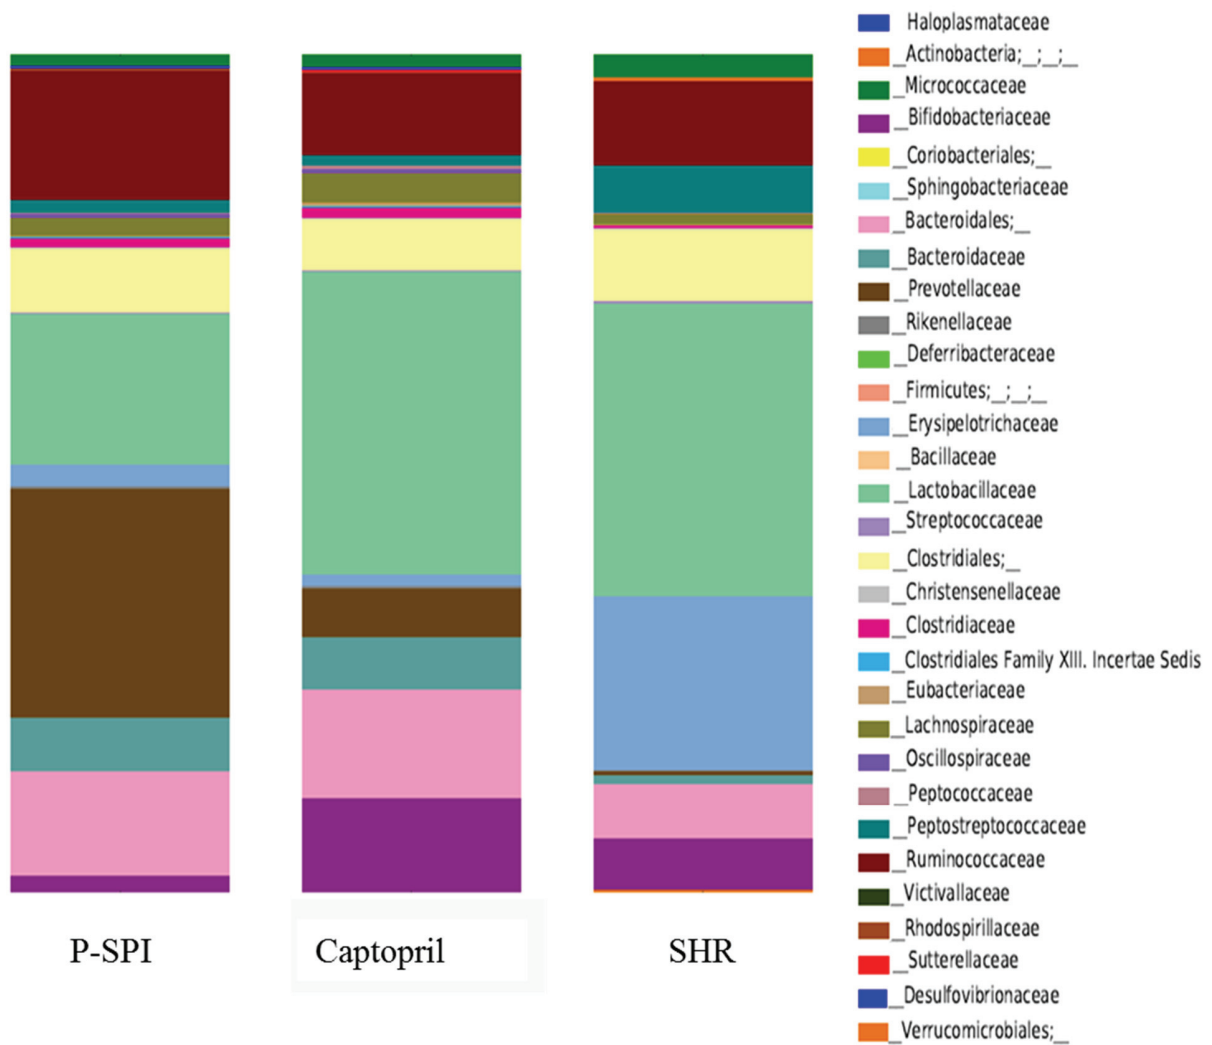

26

27 Supplementary Figure 4. Bacterial family distribution of OTUs retrieved from fecal samples.

28 Each column corresponds to spontaneous hypertensive rats fed with P-SPI, Captopril or distilled  
 29 water.

30

31

32
